# Supplementary material
Source: PubMed Central journal article supplement (PMC4020047)
Supplement: 1324194111_pnas.1324194111.sapp.pdf [file 1324194111_pnas.1324194111.sapp.pdf]

# Supporting information

## **A tick-borne segmented RNA virus contains genome segments derived from unsegmented viral ancestors**

Xin-Cheng Qin<sup>a1</sup>, Mang Shi<sup>a,b1</sup>, Jun-Hua Tian<sup>c1</sup>, Xian-Dan Lin<sup>d1</sup>, Dong-Ya Gao<sup>a</sup>, Jin-Rong He<sup>a</sup>, Jian-Bo Wang<sup>a</sup>, Ci-Xiu Li<sup>a</sup>, Yan-Jun Kang<sup>a</sup>, Bin Yu<sup>c</sup>, Dun-Jin Zhou<sup>c</sup>, Jianguo Xu<sup>a</sup>, Alexander Plyusnin<sup>a,e</sup>, Edward C. Holmes<sup>a,b</sup>, Yong-Zhen Zhang<sup>a2</sup>

<sup>a</sup>State Key Laboratory for Infectious Disease Prevention and Control, Collaborative Innovation Center for Diagnosis and Treatment of Infectious Diseases, Department of Zoonoses, National Institute for Communicable Disease Control and Prevention, Chinese Center for Disease Control and Prevention, Changping, 100206, Beijing, China.

<sup>b</sup>Marie Bashir Institute for Infectious Diseases and Biosecurity, Charles Perkins Centre, School of Biological Sciences and Sydney Medical School, The University of Sydney, Sydney, NSW 2006, Australia.

<sup>c</sup>Wuhan Center for Disease Control and Prevention, Wuhan, 430015, Hubei Province, China

<sup>d</sup>Wenzhou Center for Disease Control and Prevention, Wenzhou, 325001, Zhejiang Province, China.

<sup>e</sup>Department of Virology, Haartman Institute, University of Helsinki, Finland.

<sup>1</sup>Contributed to this work equally.

<sup>2</sup>Correspondence to: Dr. Yong-Zhen Zhang, State Key Laboratory for Infectious Disease Prevention and Control, National Institute of Communicable Disease Control and Prevention, Chinese Center for Disease Control and Prevention, Changping Liuzi 5, Beijing, 102206, China. Tel: 086-10-58900782; Email: [zhangyongzhen@icdc.cn](mailto:zhangyongzhen@icdc.cn)

# Table S1

**Table S1.** Genetic identities between putative JMTV proteins and their homologs from major groups of flaviviruses, including West Nile Virus (WNV), Dengue Virus 1 (DENV1), Tick-borne Encephalitis Virus (TBEV), Apoi virus (APOIV), Cell Fusion Agent (CFA), Tamana bat virus (TABV) and from the cDNA library of *Toxocara canis* (TCLA). Representatives of the more divergent hepatitis C virus (HCV) and pestiviruses (Pesti) are also included.

|                            | <b>TCLA</b> | <b>WNV</b> | <b>DENV1</b> | <b>YFV</b> | <b>TBEV</b> | <b>APOIV</b> | <b>CFAV</b> | <b>TABV</b> | <b>HCV</b> | <b>Pesti</b> |
|----------------------------|-------------|------------|--------------|------------|-------------|--------------|-------------|-------------|------------|--------------|
| <b>NSP1 (NS5)</b>          | 0.337*      | 0.245      | 0.246        | 0.234      | 0.242       | 0.249        | 0.252       | 0.253       | 0.140      | 0.176        |
| <b>NSP2<br/>(NS2b-NS3)</b> | 0.248       | 0.215      | 0.236        | 0.230      | 0.229       | 0.227        | 0.225       | 0.209       | 0.169      | 0.185        |
| <b>VP1</b>                 | 0.222       | –          | –            | –          | –           | –            | –           | –           | –          | –            |
| <b>VP2</b>                 | 0.194       | –          | –            | –          | –           | –            | –           | –           | –          | –            |
| <b>VP3</b>                 | 0.218       | –          | –            | –          | –           | –            | –           | –           | –          | –            |

\*The predicted NS5-like protein for TCLA is incomplete compared to JMTV and other members of the *Flaviviridae*. Only partial sequence is involved in similarity comparisons.

# Table S2

**Table S2. Background information on the JMTV positive samples**

| Strain   | Host Species                     | Place of sampling | GenBank Accession | Strain     | Host Species                     | Place of sampling | GenBank Accession |
|----------|----------------------------------|-------------------|-------------------|------------|----------------------------------|-------------------|-------------------|
| JMTVX01  | <i>Haemaphysalis longicornis</i> | Wuhan             | KJ001590          | JMTV60     | <i>Rhipicephalus microplus</i>   | Enshi             | KJ001615          |
| JMTVX06L | <i>Haemaphysalis campanulata</i> | Wuhan             | KJ001591          | JMTV62     | <i>Rhipicephalus microplus</i>   | Enshi             | KJ001616          |
| JMTVX08  | <i>Haemaphysalis longicornis</i> | Wuhan             | KJ001592          | JMTV67     | <i>Rhipicephalus microplus</i>   | Enshi             | KJ001617          |
| JMTVX23  | <i>Haemaphysalis longicornis</i> | Wuhan             | KJ001593          | JMTV69A    | <i>Rhipicephalus microplus</i>   | Enshi             | KJ001618          |
| JMTVX27  | <i>Rhipicephalus microplus</i>   | Wuhan             | KJ001594          | JMTV69B    | <i>Rhipicephalus microplus</i>   | Enshi             | KJ001619          |
| JMTVX35  | <i>Rhipicephalus microplus</i>   | Wuhan             | KJ001595          | JMTV72     | <i>Rhipicephalus microplus</i>   | Yichang           | KJ001620          |
| JMTVX37  | <i>Rhipicephalus microplus</i>   | Wuhan             | KJ001596          | JMTV84     | <i>Rhipicephalus microplus</i>   | Jingmen           | KJ001621          |
| JMTVX39H | <i>Haemaphysalis campanulata</i> | Wuhan             | KJ001597          | JMTV85     | <i>Rhipicephalus microplus</i>   | Jingmen           | KJ001634          |
| JMTVX39L | <i>Haemaphysalis longicornis</i> | Wuhan             | KJ001598          | JMTV90     | <i>Rhipicephalus microplus</i>   | Jingmen           | KJ001622          |
| JMTVx41  | <i>Rhipicephalus microplus</i>   | Wuhan             | KJ001599          | JMTV112    | <i>Rhipicephalus microplus</i>   | Xiangfan          | KJ001623          |
| JMTVX55  | <i>Haemaphysalis flava</i>       | Wuhan             | KJ001600          | JMTV118    | <i>Rhipicephalus microplus</i>   | Xiangfan          | KJ001624          |
| JMTVH101 | <i>Ixodide sinesis</i>           | Wuhan             | KJ001630          | JMTV123    | <i>Rhipicephalus microplus</i>   | Xiangfan          | KJ001625          |
| JMTV11   | <i>Rhipicephalus microplus</i>   | Shiyan            | KJ001603          | JMTV129    | <i>Rhipicephalus microplus</i>   | Xiangfan          | KJ001626          |
| JMTV12   | <i>Rhipicephalus microplus</i>   | Shiyan            | KJ001604          | JMTVZY1-7  | <i>Haemaphysalis flava</i>       | Xiangfan          | KJ001601          |
| JMTV16   | <i>Rhipicephalus microplus</i>   | Shiyan            | KJ001605          | JMTVZY2-4  | <i>Haemaphysalis flava</i>       | Xiangfan          | KJ001602          |
| JMTV19   | <i>Rhipicephalus microplus</i>   | Shiyan            | KJ001606          | JMTV138    | <i>Rhipicephalus microplus</i>   | Jingmen           | KJ001627          |
| JMTV29   | <i>Rhipicephalus microplus</i>   | Shiyan            | KJ001632          | JMTV141    | <i>Rhipicephalus microplus</i>   | Jingmen           | KJ001628          |
| JMTV33   | <i>Rhipicephalus microplus</i>   | Shennongjia       | KJ001607          | JMTV157    | <i>Rhipicephalus microplus</i>   | Jingmen           | KJ001629          |
| JMTV34   | <i>Rhipicephalus microplus</i>   | Shennongjia       | KJ001608          | JMTVWC3    | <i>Ixodes granulatus</i>         | Wenzhou           | KJ001633          |
| JMTV36   | <i>Haemaphysalis longicornis</i> | Shennongjia       | KJ001631          | JMTVningbo | <i>Rhipicephalus sanguineus</i>  | ningbo            | KJ001589          |
| JMTV39   | <i>Rhipicephalus microplus</i>   | Shennongjia       | KJ001609          | JMTVH115-1 | <i>Haemaphysalis longicornis</i> | Wuhan             | KJ001584          |
| JMTV47   | <i>Rhipicephalus microplus</i>   | Yichang           | KJ001610          | JMTVH115-4 | <i>Haemaphysalis longicornis</i> | Wuhan             | KJ001585          |
| JMTV48   | <i>Rhipicephalus microplus</i>   | Yichang           | KJ001611          | JMTVH115-5 | <i>Haemaphysalis longicornis</i> | Wuhan             | KJ001586          |
| JMTV49   | <i>Rhipicephalus microplus</i>   | Yichang           | KJ001612          | JMTVH118-6 | <i>Haemaphysalis longicornis</i> | Wuhan             | KJ001587          |
| JMTV52   | <i>Rhipicephalus microplus</i>   | Enshi             | KJ001613          | JMTVX114-1 | <i>Haemaphysalis longicornis</i> | Wuhan             | KJ001588          |
| JMTV53   | <i>Rhipicephalus microplus</i>   | Enshi             | KJ001614          | JMTVDJ1-1  | <i>Armigeres sp</i>              | Wuhan             | KJ001583          |

# Table S3

**Table S3. Background information on de-pooled JMTV positive samples**

| Strain  | Host species                   | Place of Sampling | GenBank Accession |           |           |           |
|---------|--------------------------------|-------------------|-------------------|-----------|-----------|-----------|
|         |                                |                   | Segment 1         | Segment 2 | Segment 3 | Segment 4 |
| YS102-1 | <i>Rhipicephalus microplus</i> | Wuhan             | KJ001547          | KJ001555  | KJ001563  | KJ001571  |
| YJ3-3   | <i>Rhipicephalus microplus</i> | Wenzhou           | KJ001548          | KJ001556  | KJ001564  | KJ001572  |
| 10      | <i>Rhipicephalus microplus</i> | Shiyan            | KJ001549          | KJ001557  | KJ001565  | KJ001573  |
| 84      | <i>Rhipicephalus microplus</i> | Jingmen           | KJ001550          | KJ001558  | KJ001566  | KJ001574  |
| 85      | <i>Rhipicephalus microplus</i> | Jingmen           | KJ001551          | KJ001559  | KJ001567  | KJ001575  |
| 164     | <i>Rhipicephalus microplus</i> | Jingmen           | KJ001552          | KJ001560  | KJ001568  | KJ001576  |
| 204     | <i>Rhipicephalus microplus</i> | Jingzhou          | KJ001553          | KJ001561  | KJ001569  | KJ001577  |
| X84-3   | <i>Rhipicephalus microplus</i> | Wuhan             | KJ001554          | KJ001562  | KJ001570  | KJ001578  |

# Figure S1

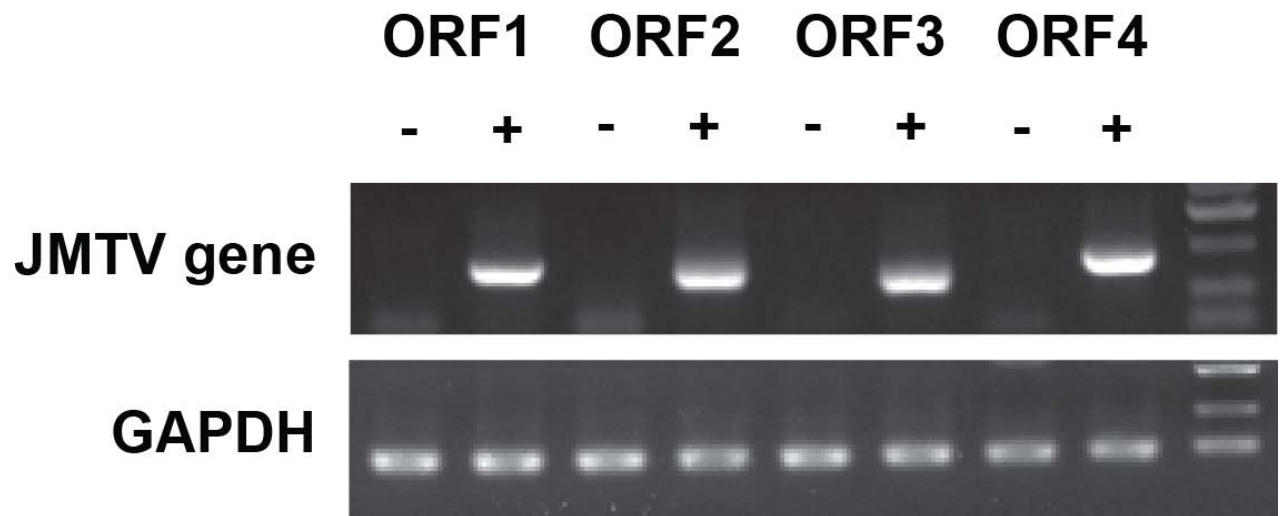

**Figure S1.** Detection of four JMTV segments in infected and uninfected DH82 cells. The GAPDH gene is used as a cellular control.

## Figure S2

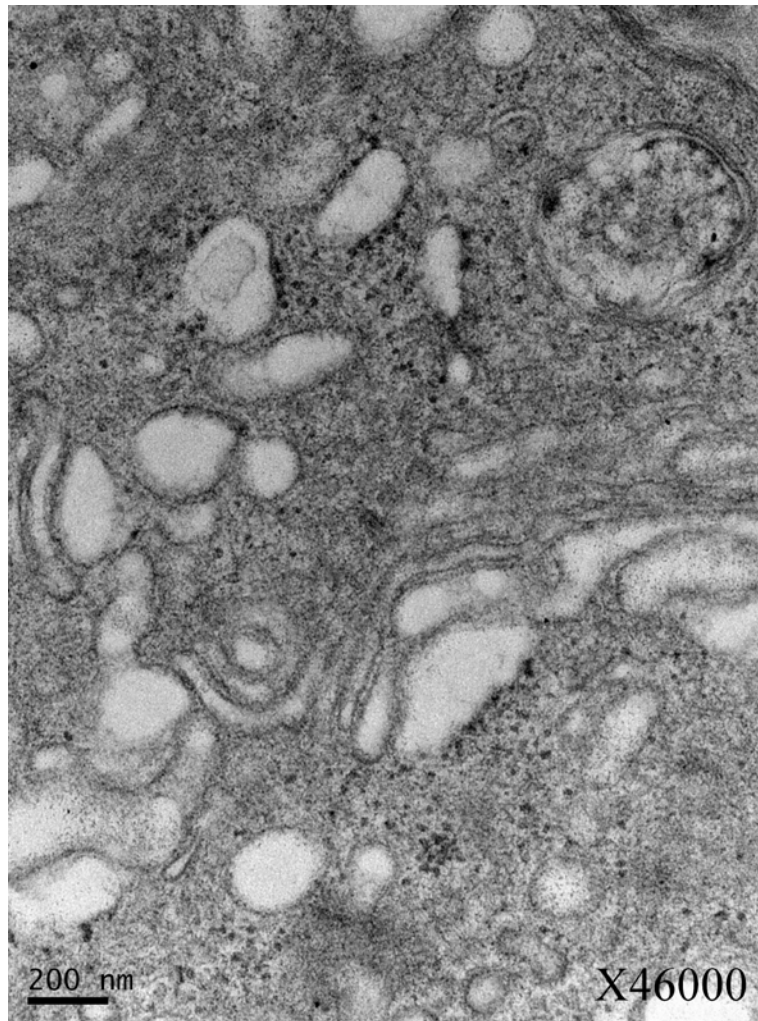

**Figure S2.** Transmission electron micrograph of uninfected DH82 cells.

# Figure S3

(A)

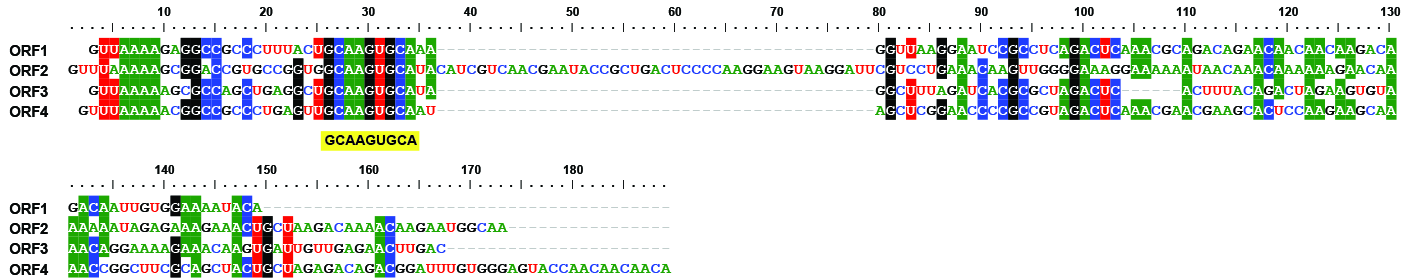

(B)

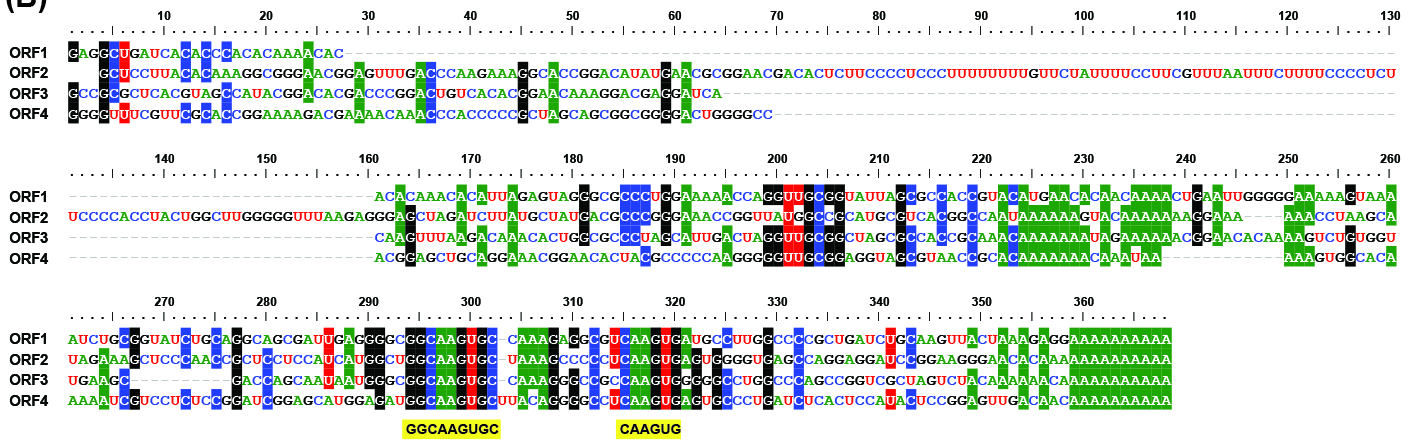

Figure S3. Nucleotide sequence alignment of A) 5' and B) 3' UTRs of the four JMTV segments. The conserved nucleotides are indicated below the sequence and are shaded yellow.

# Figure S4

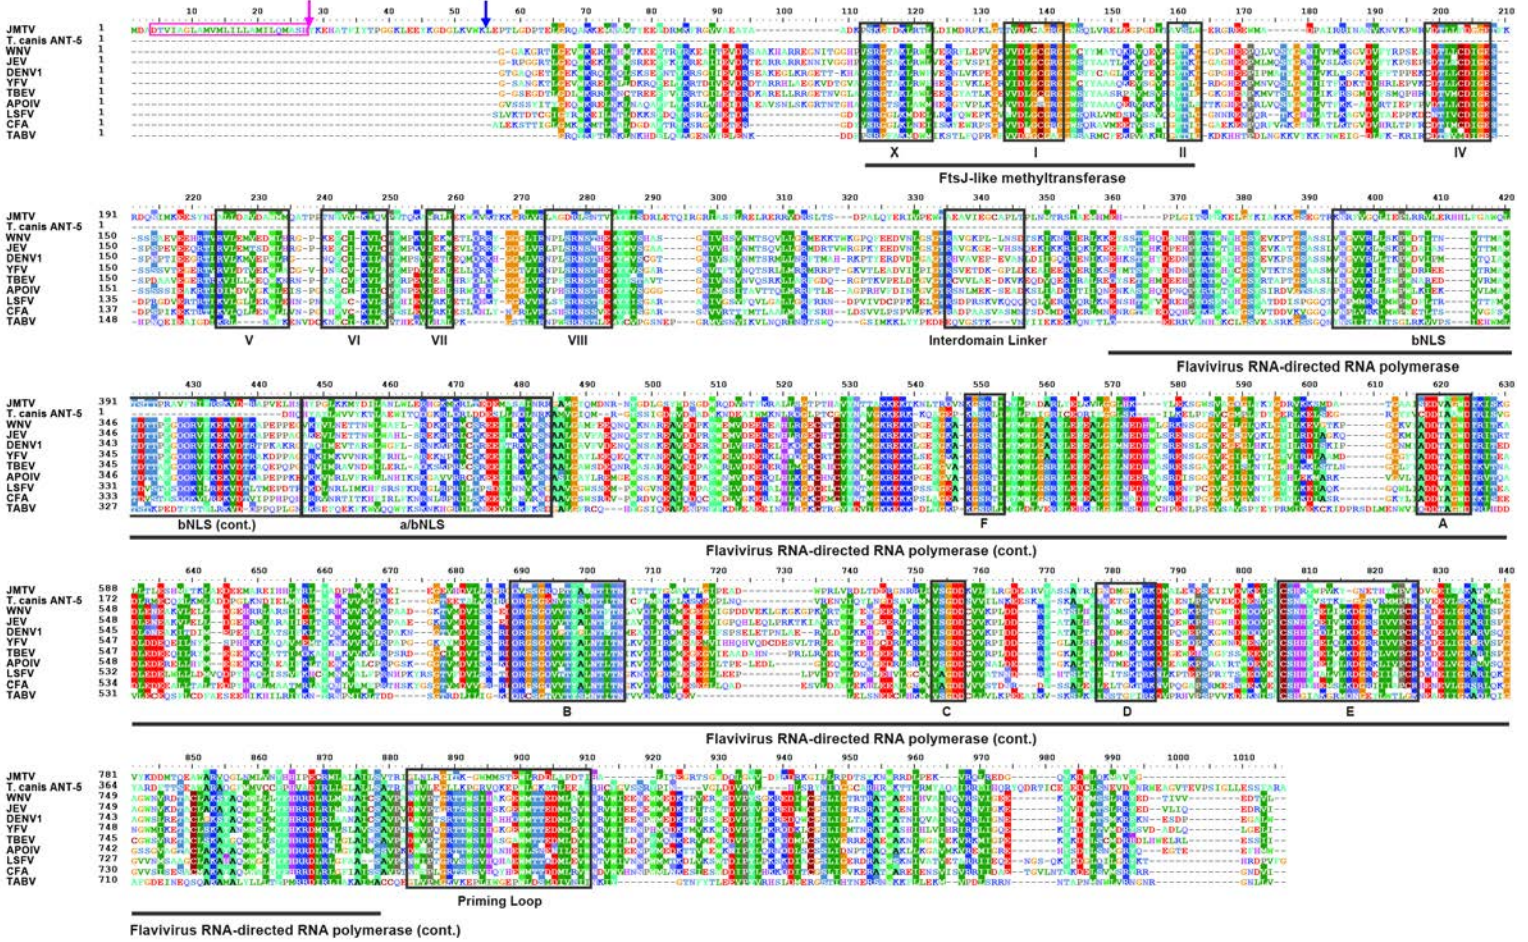

**Figure S4.** Amino acid alignment of the NS5 proteins of JMTV, TCLA, and representatives from the genus *Flavivirus*. This shows the results of the homology search against the Conserved Domain Database in NCBI (grey lines) and the conserved motifs of the flavivirus methyltransferase and RdRp (grey boxes). Also shown are the predicted transmembrane domains (pink box), signal peptide cleavage site (pink arrows), and serine protease cleavage site (blue arrows) of JMTV.



# Figure S5

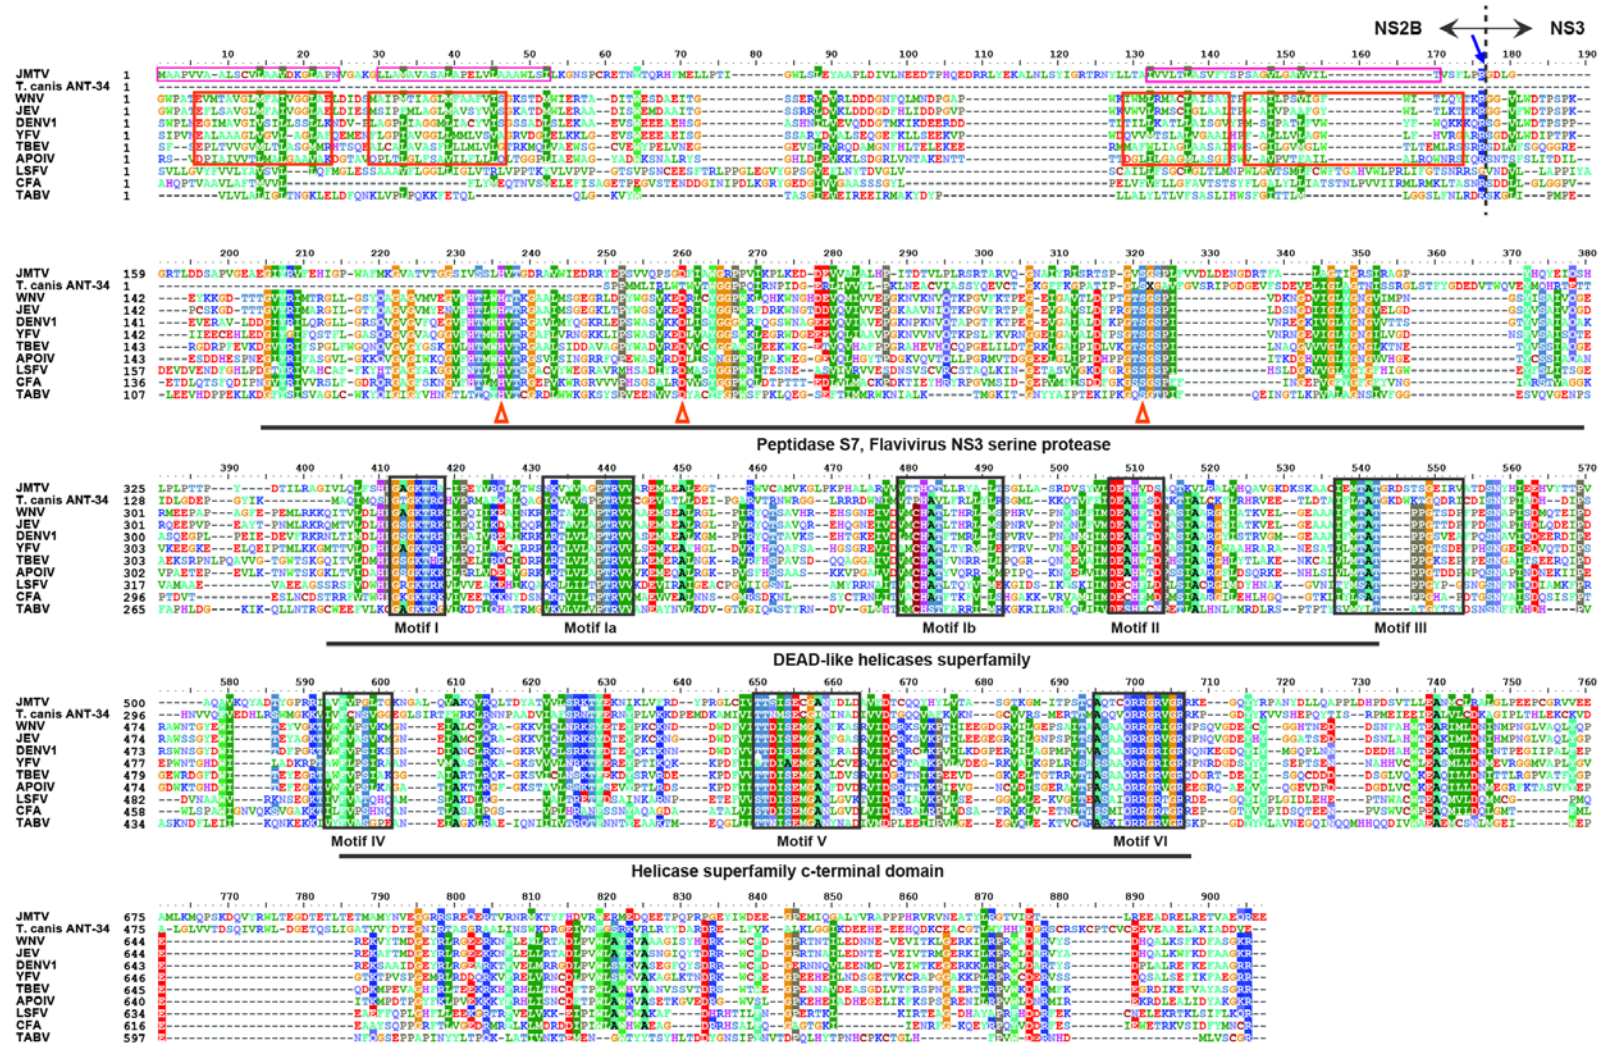

**Figure S5.** Amino acid alignment of the NS2b-NS3 complex of JMTV, TCLA, and representatives from the genus *Flavivirus*. This shows the results of the homology search against the Conserved Domain Database in NCBI (grey lines), the transmembrane domains of the flavivirus NS2B protein (orange boxes), the conserved motifs of the flavivirus helicase (grey boxes), and the positions of the catalytic triad in serine protease (orange triangles). Also shown are the predicated transmembrane domains (pink boxes) and serine protease cleavage site (blue arrow) of JMTV.

# Figure S6

(A)

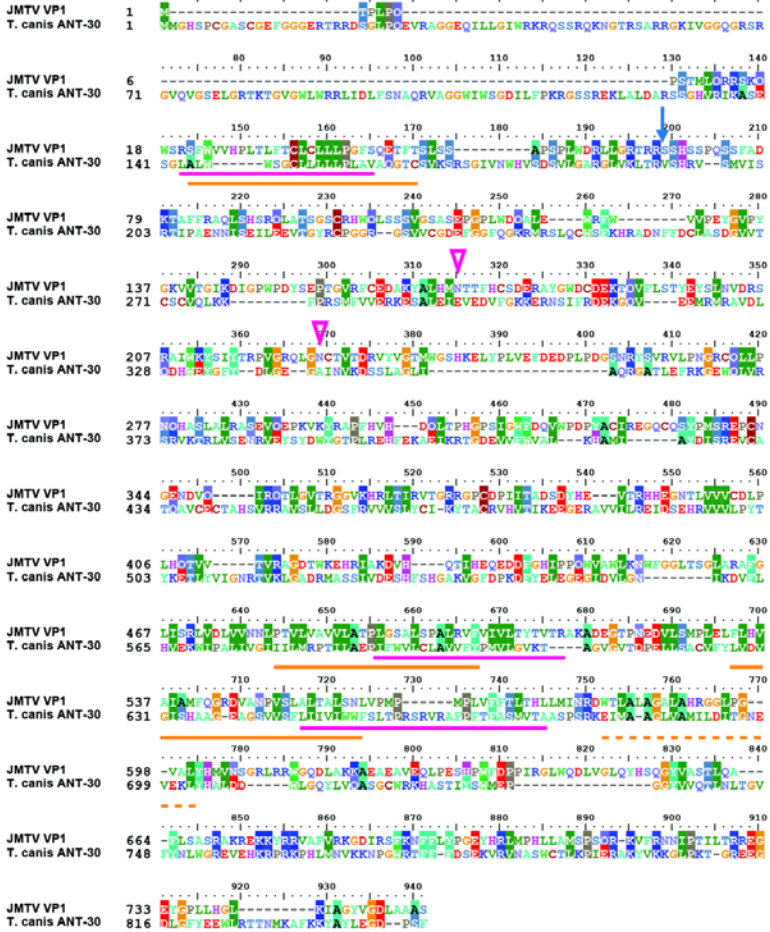

(B)

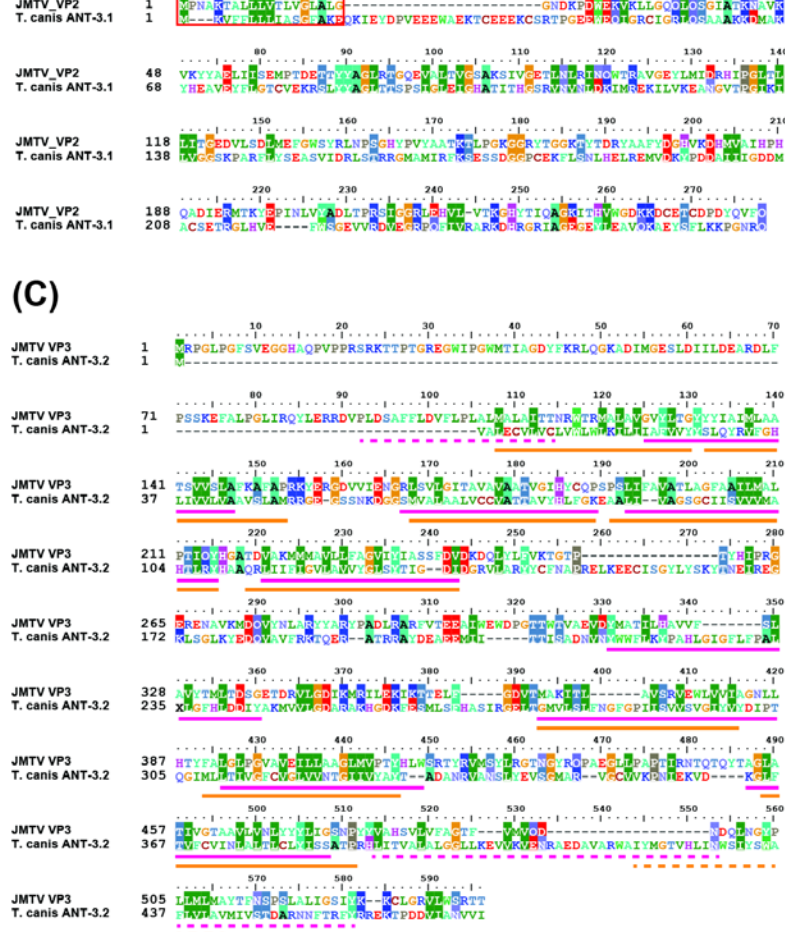

(C)

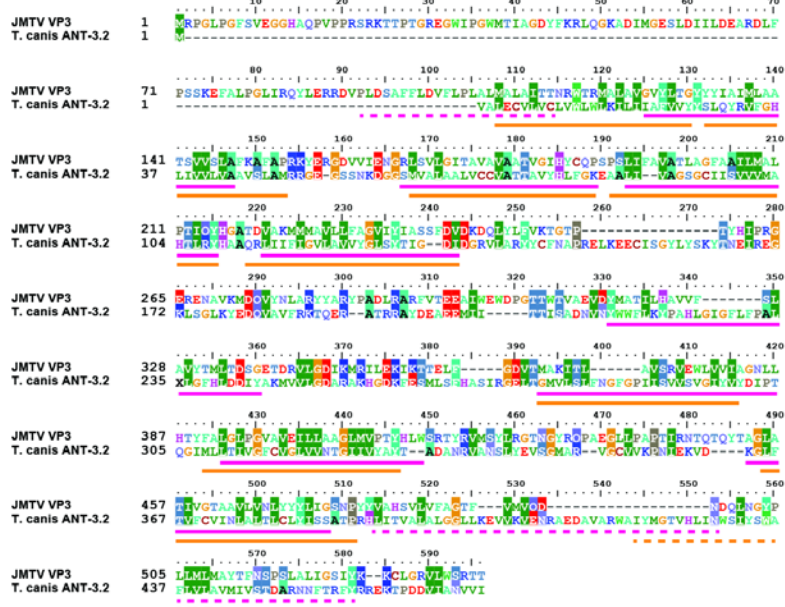

**Figure S6.** Amino acid alignments of the A) VP1, B) VP2 and C) VP3 of JMTV to their corresponding homologs in TCLA, which shows the predicated transmembrane domains (pink lines), serine protease cleavage site (blue arrow), signal peptides (red box), and N-linked glycosylation sites (pink triangles) of JMTV. Also shown are the predicated transmembrane domains (yellow lines), serine protease cleavage site (blue arrow), and signal peptides (red box) of TCLV.

## Figure S7

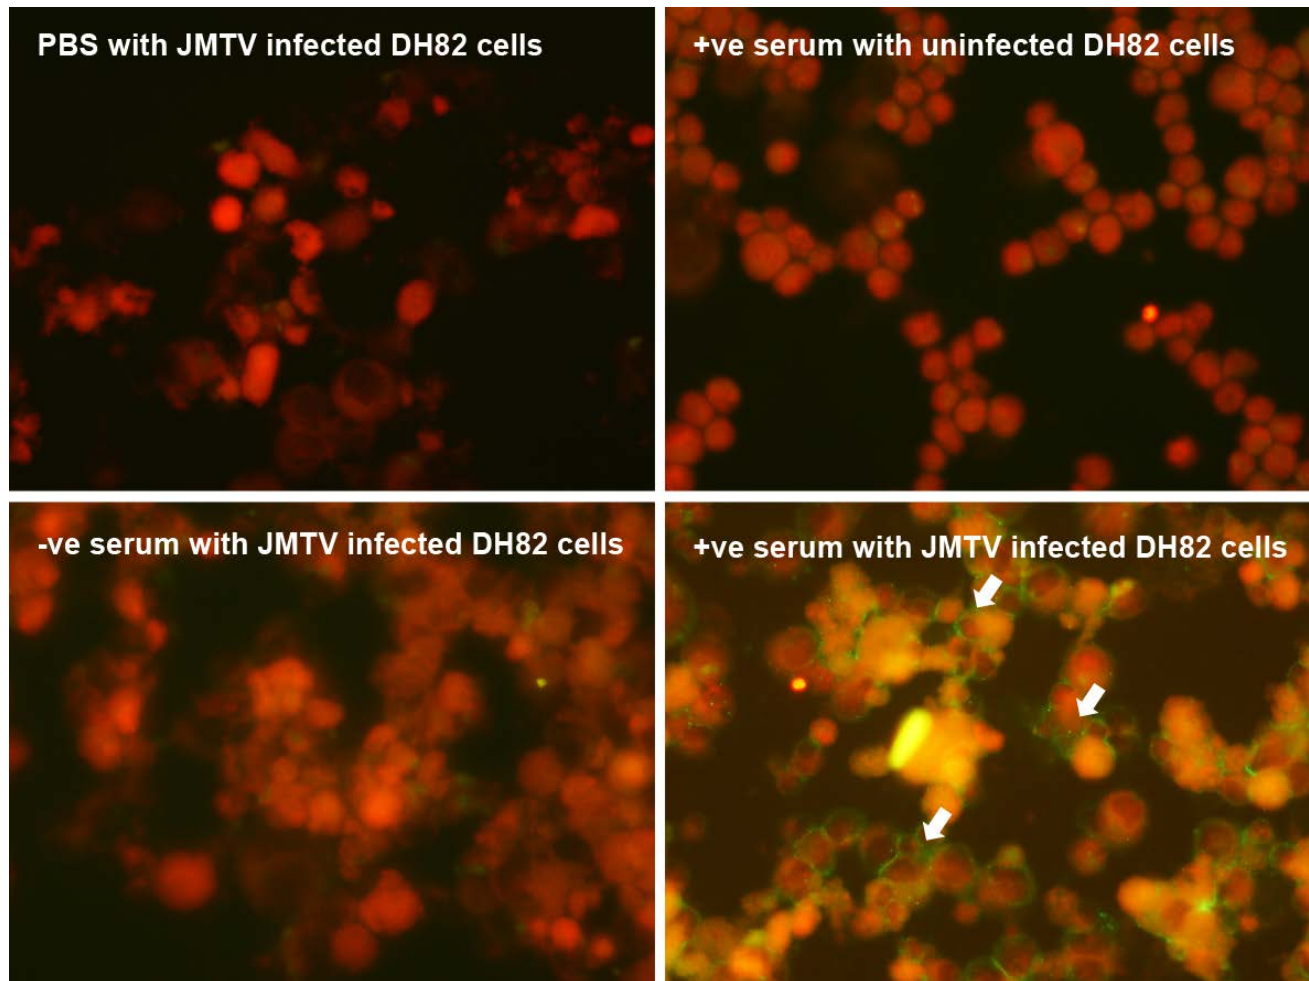

**Figure S7.** Typical serological reactivity of cattle sera with viral antigens in JMTV infected DH82 cells (lower right). The controls are PBS and JMTV negative serum with JMTV infected DH82 cells, and JMTV positive serum with uninfected DH82 cells. The arrows indicate specific staining of cytoplasmatic antigen.

# Figure S8

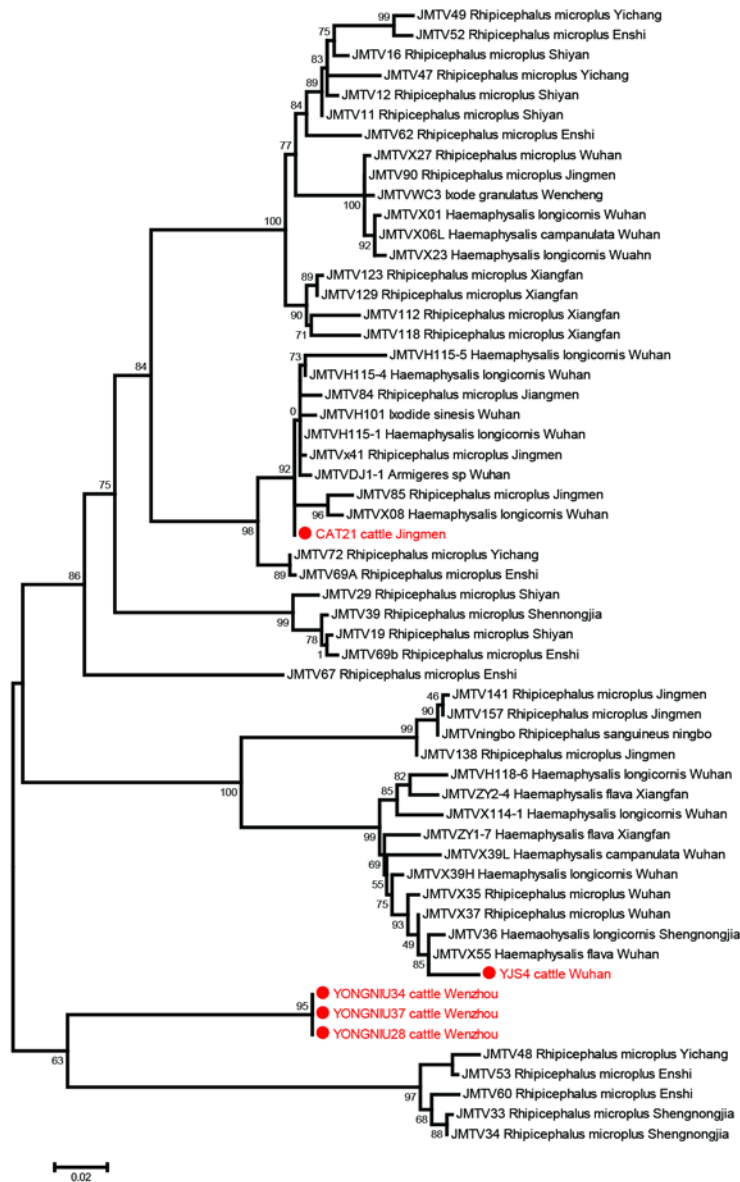

**Figure S8.** The phylogenetic positions (NSP2 gene) of JMTVs detected from cattle blood. The tree is mid-point rooted and all horizontal branches are drawn to a scale of nucleotide substitutions per site. The cattle blood samples are highlighted in red. The taxon labels contain strain names, host (species), and sample locations.

# Figure S9

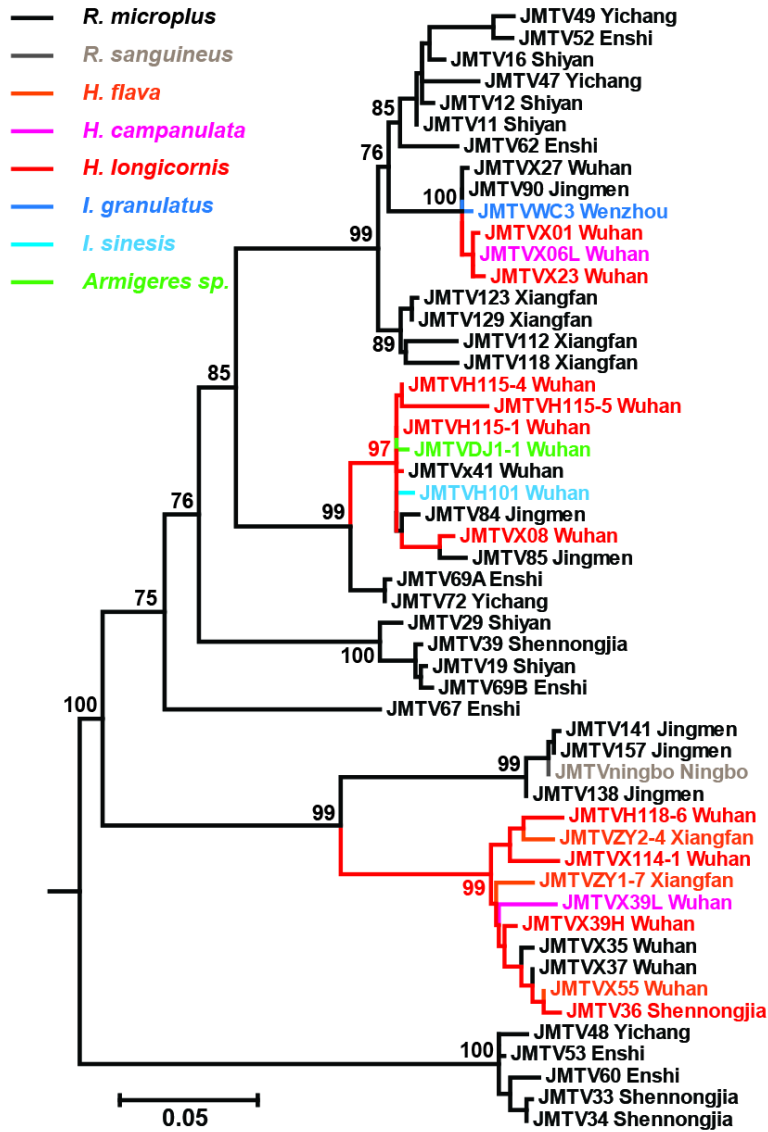

**Figure S9.** ML phylogenetic tree of JMTV NSP2 gene sequences sampled from various geographic locations across China. The tree is mid-point rooted and all horizontal branches are drawn to a scale of nucleotide substitutions per site. For clarity, bootstrap values are only shown for internal nodes. The branch and taxon labels are colored based on arthropod species. The taxon labels contain strain names and sample locations for each pool.

**Figure S10**

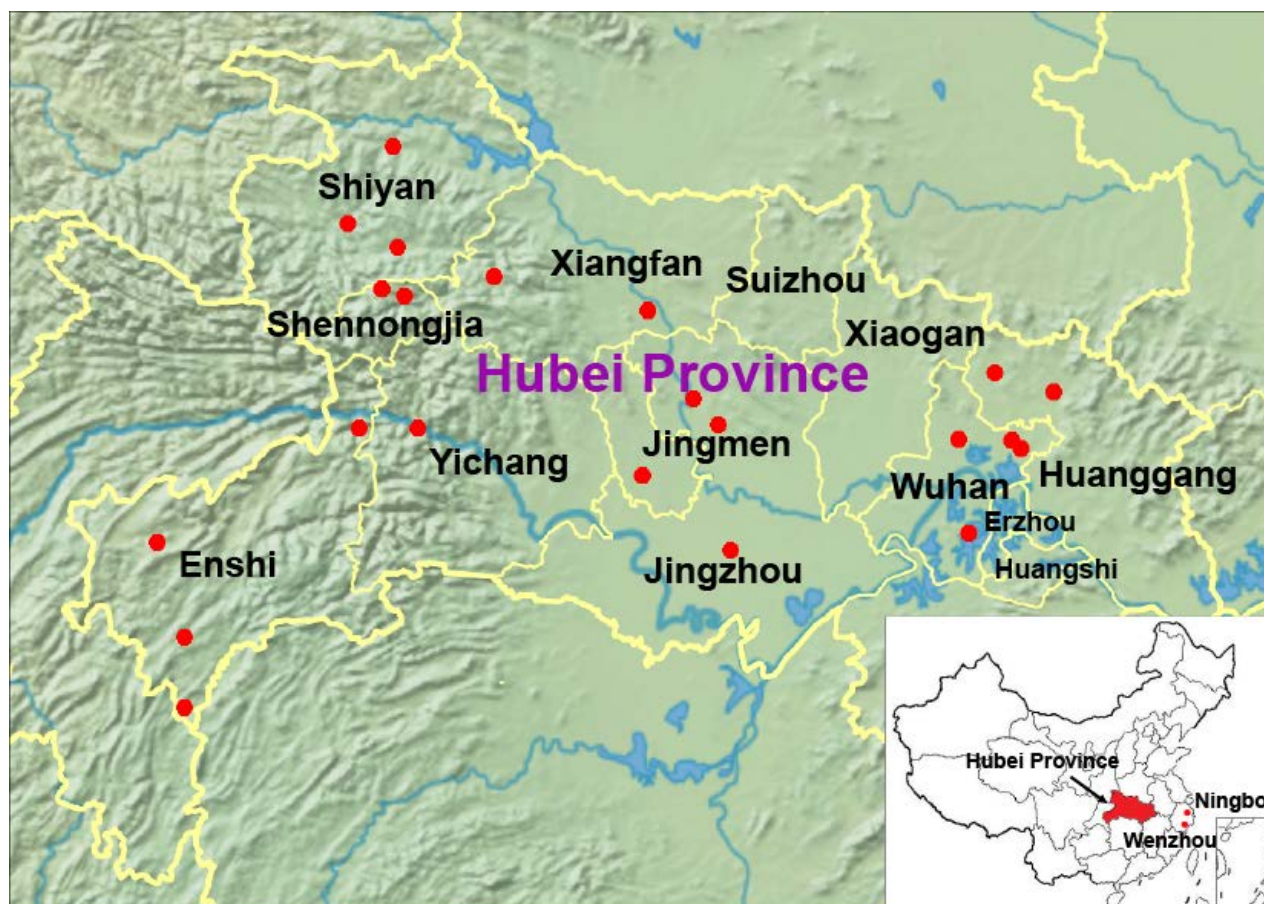

**Figure S10.** Map of Hubei and Zhejiang provinces showing the locations of sample collection sites.
